# Supplementary material for: High-throughput DNA methylation profiling using universal bead arrays
Source: HighWire-hosted journal article supplement (doi:10.1101/gr.4410706), 2006-01-31

Supplementary Figure 1.

Methylation measurement with internal controls. Methylated, unmethylated and semi-methylated (generated by pre-mixing the methylated and unmethylated at 1:1 ratio) plasmid DNAs were spiked into human genomic DNA at 1:1 molar ratio, and 96 assays were run in parallel. Green, yellow and red colors represent low, medium and high methylation levels, respectively

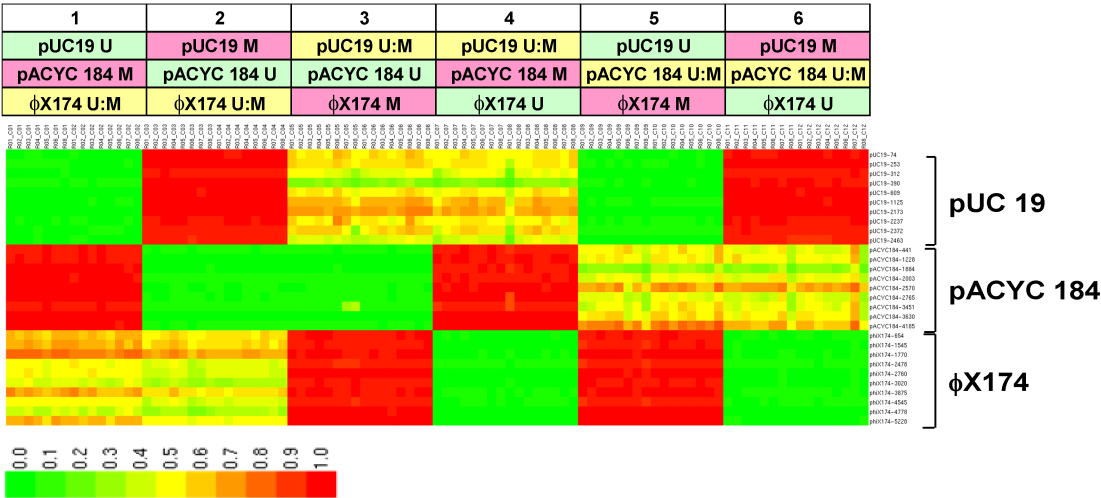

Supplement: supp_fig_1.pdf [file supp_fig_1.pdf]
